# Supplementary material for: The effect of solvent on one-dimensional cadmium coordination polymers
Source: Royal Society of Chemistry journal article supplement (doi:10.1039/c8nj02110d), 2018-01-01
Supplement: c8nj02110d1.pdf [file c8nj02110d1.pdf]

## Electronic Supporting Information

### New Journal of Chemistry

# The effect of solvent on one-dimensional cadmium coordination polymers

Behrouz Notash,\* Bahareh Rezaei Kheirkhah

*Department of Inorganic Chemistry and Catalysis, Shahid Beheshti University,*

*General Campus, Evin, Tehran 1983963113, Iran*

*E-mail: b\_notash@sbu.ac.ir*

**Table S1** Different methods for synthesis of compound **1**.

| <b>M:L</b> | <b>Solvent</b>          | <b>T(°C)</b> | <b>Method</b>     |
|------------|-------------------------|--------------|-------------------|
| 1:1        | MeOH                    | 60           | Convection        |
| 1:1        | EtOH                    | 60           | Convection        |
| 1:1        | CH <sub>3</sub> CN      | 60           | Convection        |
| 1:1        | MeOH:DMF                | RT(25°C)     | Solvent diffusion |
| 1:1        | H <sub>2</sub> OH:MeOH  | RT(25°C)     | Solvent diffusion |
| 1:1        | EtOH:CH <sub>3</sub> CN | RT(25°C)     | Solvent diffusion |

**Table S2** Selected bond lengths [Å] and angles [°] for **1**.

|                   |                  |                        |                   |
|-------------------|------------------|------------------------|-------------------|
| <b>Cd(1)—N(1)</b> | <b>2.315(5)</b>  | <b>N(1)—Cd(1)—I(2)</b> | <b>106.80(13)</b> |
| <b>Cd(1)—I(1)</b> | <b>2.695(12)</b> | <b>N(1)—Cd(1)—I(1)</b> | <b>104.10(13)</b> |
| <b>Cd(1)—I(2)</b> | <b>2.684(10)</b> | <b>I(1)—Cd(1)—I(2)</b> | <b>134.49(4)</b>  |

**Table S3** Selected bond lengths [Å] and angles [°] for **2**.

|                                                                              |                  |                        |                  |
|------------------------------------------------------------------------------|------------------|------------------------|------------------|
| <b>Cd(1)—N(1)</b>                                                            | <b>2.341(6)</b>  | <b>N(1)—Cd(1)—I(2)</b> | <b>99.89(14)</b> |
| <b>Cd(1)—N(4)<sup>#1</sup></b>                                               | <b>2.358(6)</b>  | <b>I(1)—Cd(1)—I(2)</b> | <b>98.19(2)</b>  |
| <b>Cd(1)—I(1)</b>                                                            | <b>2.9229(7)</b> | <b>N(1)—Cd(1)—O(2)</b> | <b>86.8(2)</b>   |
| <b>Cd(1)—I(2)</b>                                                            | <b>2.8356(8)</b> | <b>N(1)—Cd(1)—O(1)</b> | <b>79.9(2)</b>   |
| <b>Cd(1)—O(1)</b>                                                            | <b>2.510(4)</b>  | <b>O(2)—Cd(1)—O(1)</b> | <b>86.17(15)</b> |
| <b>Cd(1)—O(2)</b>                                                            | <b>2.348(4)</b>  | <b>O(2)—Cd(1)—I(2)</b> | <b>83.42(11)</b> |
| <b>Symmetry code: #1: <math>-x, y + \frac{1}{2}, -z + \frac{1}{2}</math></b> |                  |                        |                  |

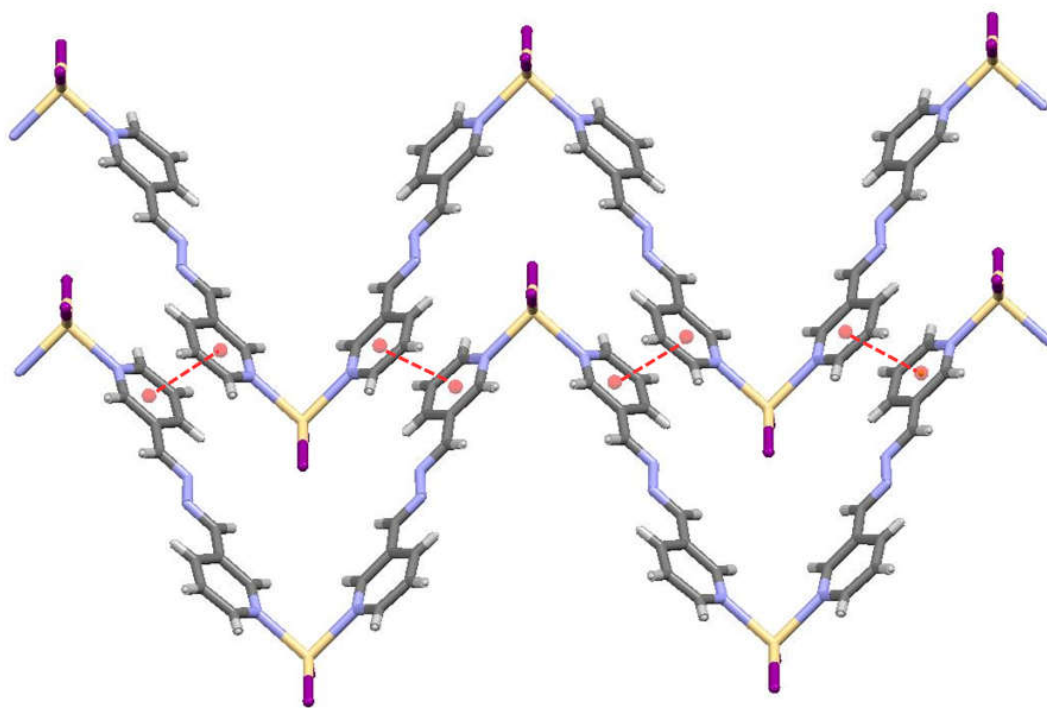

**Figure S1**  $\pi$ - $\pi$  interactions with a Cg-Cg distance of 3.489(4) Å in **1**.

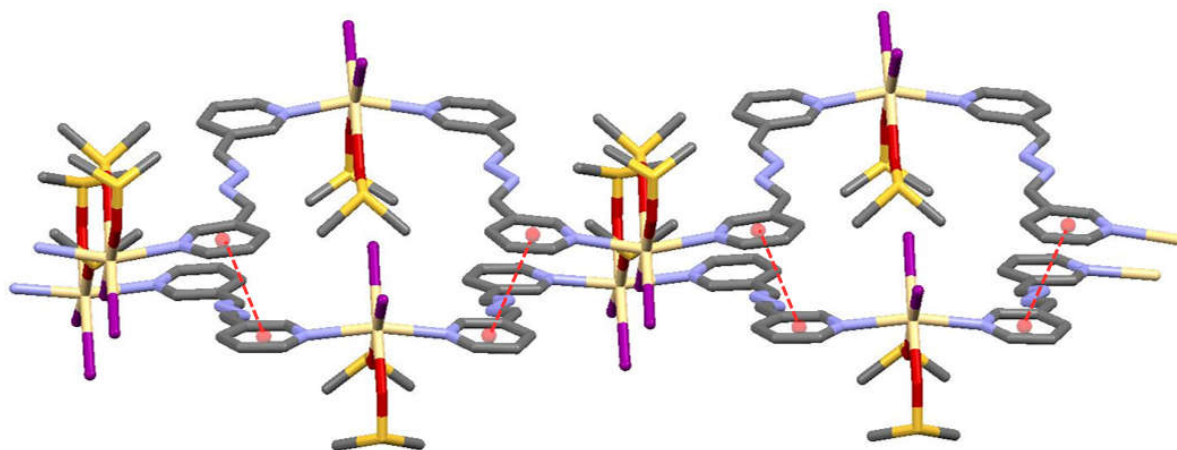

**Figure S2**  $\pi$ - $\pi$  interactions with a Cg-Cg distance of 3.684(4) Å in **2**.

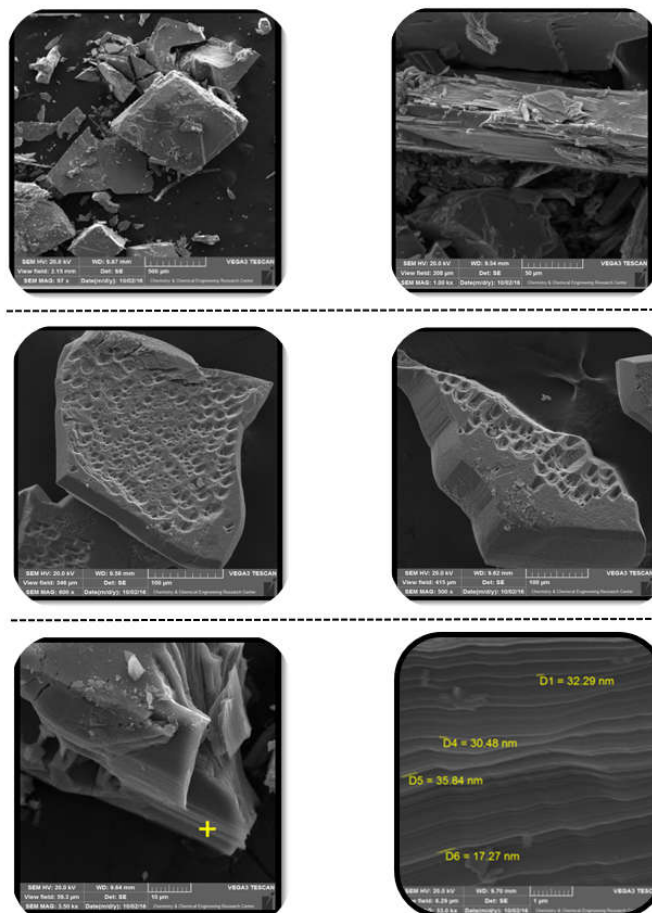

**Figure S3** SEM images of crystal of compound **1** obtained in different solvents.

top: methanol, middle: ethanol, bottom: acetonitrile.

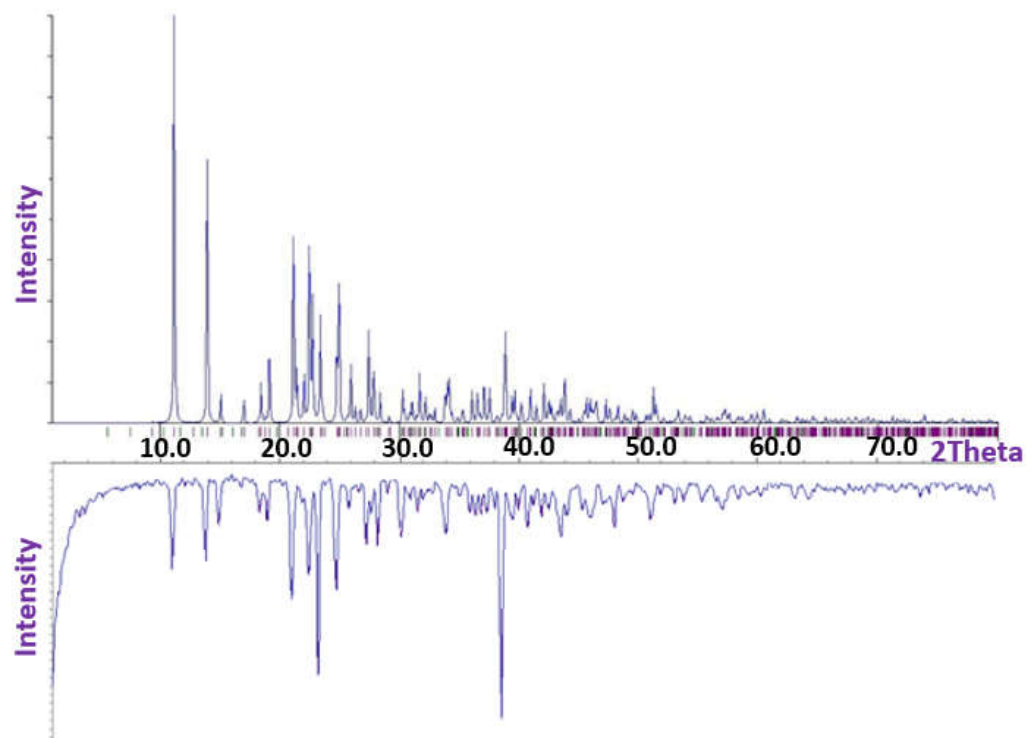

**Figure S4** PXRD patterns of compound 1: (top) simulated, (bottom) as-synthesized.

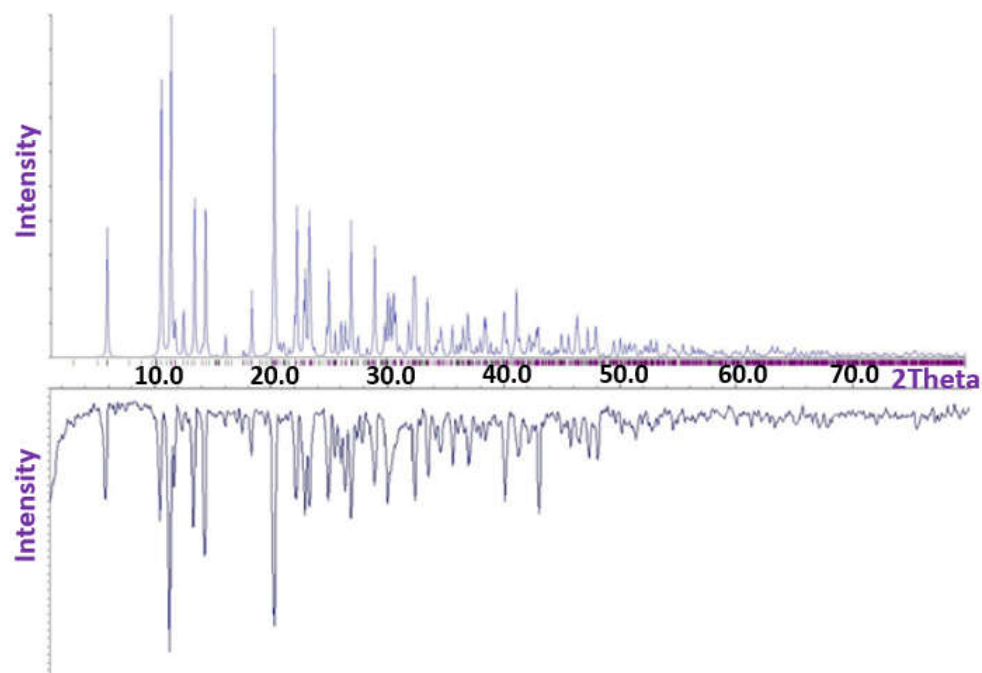

**Figure S5** PXRD patterns of compound 2: (top) simulated, (bottom) as-synthesized.
